# Supplementary material for: Amino-grafted graphene as a stable and metal-free solid basic catalyst
Source: Royal Society of Chemistry journal article supplement (doi:10.1039/c2jm30442b), 2012-01-01
Supplement: c2jm30442b.pdf [file c2jm30442b.pdf]

Supporting materials for

## Amino-grafted Graphene as Stable and Metal-free Solid Basic Catalyst

5 Chengfei Yuan, Wufeng Chen, and Lifeng Yan\*

Fig.S1 shows the low resolution TEM and AFM images of single  $\text{NEt}_3$ -graphene sheet. Clearly, the crumpling feature make it difficult to measure the thickness of sheet, and it can be measured at the edge of sample by AFM. As shown in Fig.S1c, the thickness of the sheet is about 0.95 nm, indicating the  $\text{NEt}_3$ -graphene sheet is in single layer.

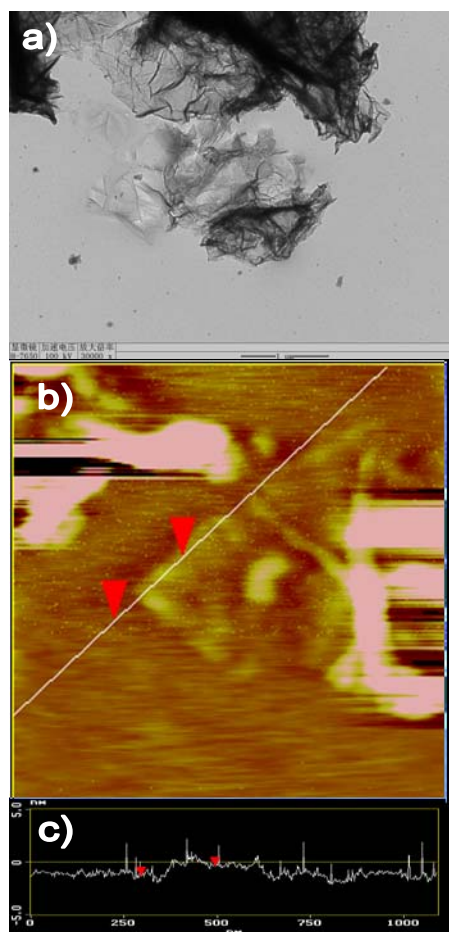

15 Fig. S1 Low resolution TEM (a) and AFM (b) images of single  $\text{NEt}_3$ -graphene sheet, and the section line of it (c).

Figure S2 shows the FT-IR spectra of GO, r-GO and  $\text{NEt}_3$ -graphene. For GO, the characteristic peaks appear for carboxy C-O ( $1733\text{ cm}^{-1}$ ), aromatic ( $1624\text{ cm}^{-1}$ ), carboxy C-O ( $1414\text{ cm}^{-1}$ ), and epoxy C-O ( $1229\text{ cm}^{-1}$ ).<sup>1</sup> After reduction, the peaks for the oxygen functional groups were reduced significantly. For  $\text{NEt}_3$ -graphene the FT-IR spectrum looks very similar to rGO and the result is the same as to  $\text{NEt}_3$ -CNT, and Graupner suggested amino-modification of carbon is difficult to be directly measured by FT-IR.<sup>2</sup>

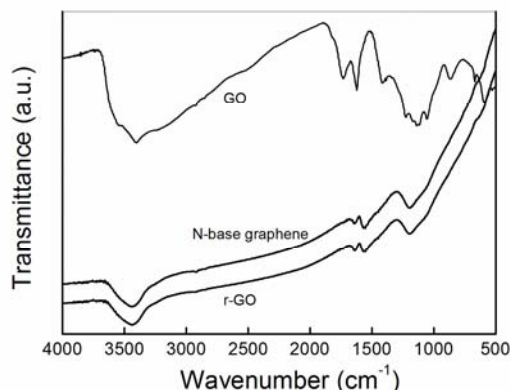

Fig.2S FT-IR spectra of GO, rGO and  $\text{NEt}_3$ -graphene.

The content of nitrogen can also be measured by by energy-dispersive X-ray spectroscopy (EDX) attached to SEM. As shown in Figure S3, the characteristic peak for nitrogen can be clearly found, also indicating the successful grafting of amino groups onto graphene. At the same time, the EDS didn't show any characteristic peak of Li ( $\sim 0.055\text{ KeV}$ ) and therefore the high activity of the  $\text{NEt}_3$ -graphene basic catalyst can not be attributed to Li impurities that originate from the n-BuLi employed in the synthesis.

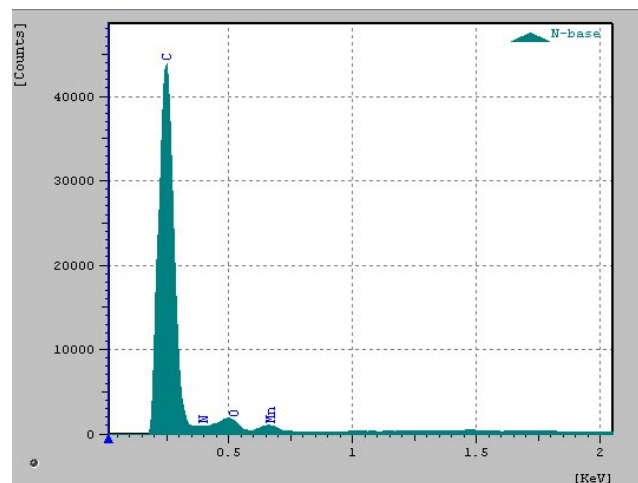

Fig.3S The EDS spectrum of the  $\text{NEt}_3$ -graphene.

### References

- 40 1. W. Chen, L. Yan and P. R. Bangal, *Carbon*, 2010, **48**, 1146-1152  
2. R. Graupner, J. Abraham, D. Wunderlich, A. Vencelová, P. Lauffer, J. Röhrli, M. Hundhausen, L. Ley and A. Hirsch, *J. Am. Chem. Soc.*, 2006, **128**, 6683-6689.
